# Supplementary material
Source: Springer Nature journal article supplement (https://www.springermedizin.de/resource/supplementary/12889_2011_4344_MOESM2_ESM.pdf/9491672)

**Stair climbing always burns calories. One flight uses about 2.8 calories but 10 flights a day would use 28 calories. Over a year that adds up to 10,000+ calories; that's more than four days' worth of food.**

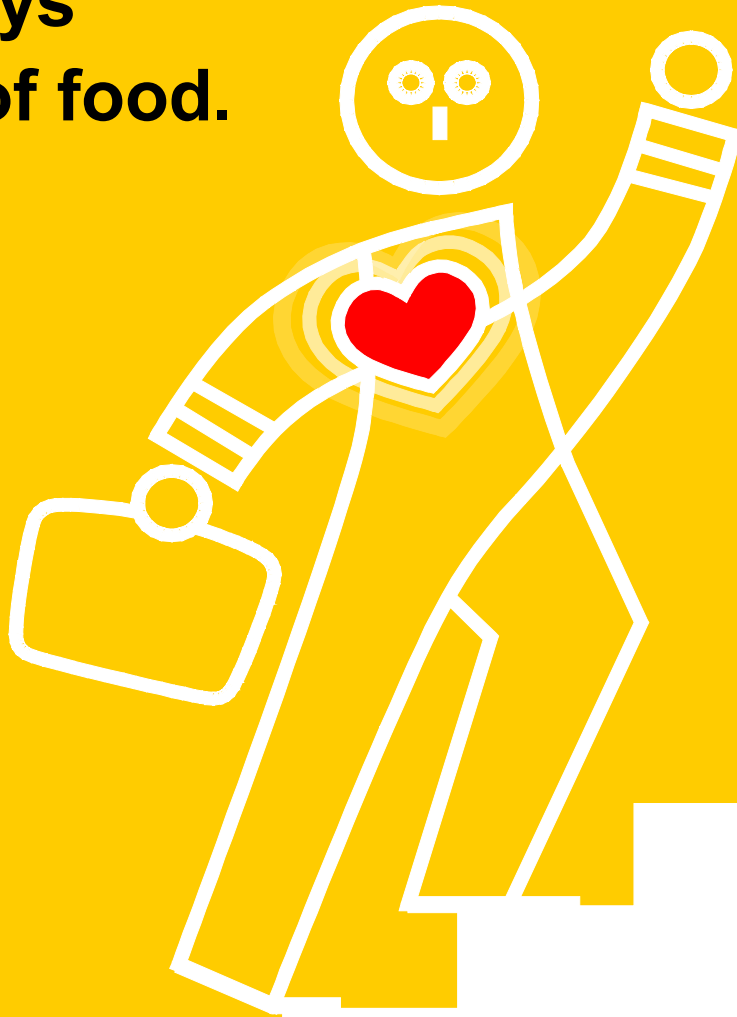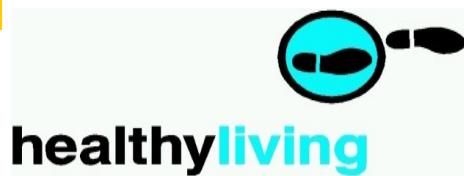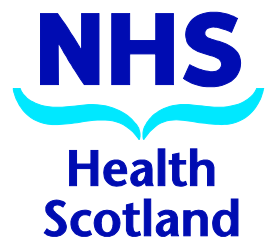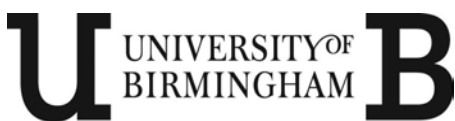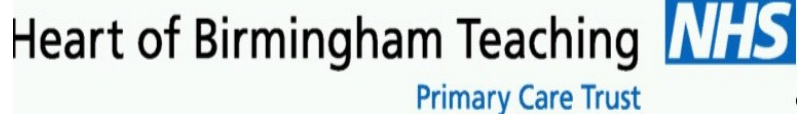

Supplement: MOESM2 [file 9491672]
